# Supplementary material
Source: PubMed Central journal article supplement (PMC129342)

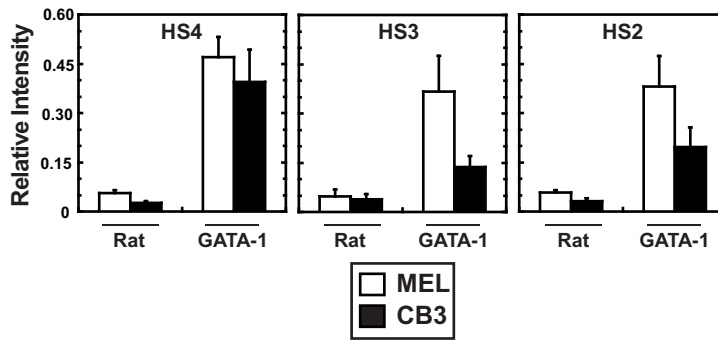

Supplement: pnas_192285999_4.pdf [file pnas_192285999_4.pdf]

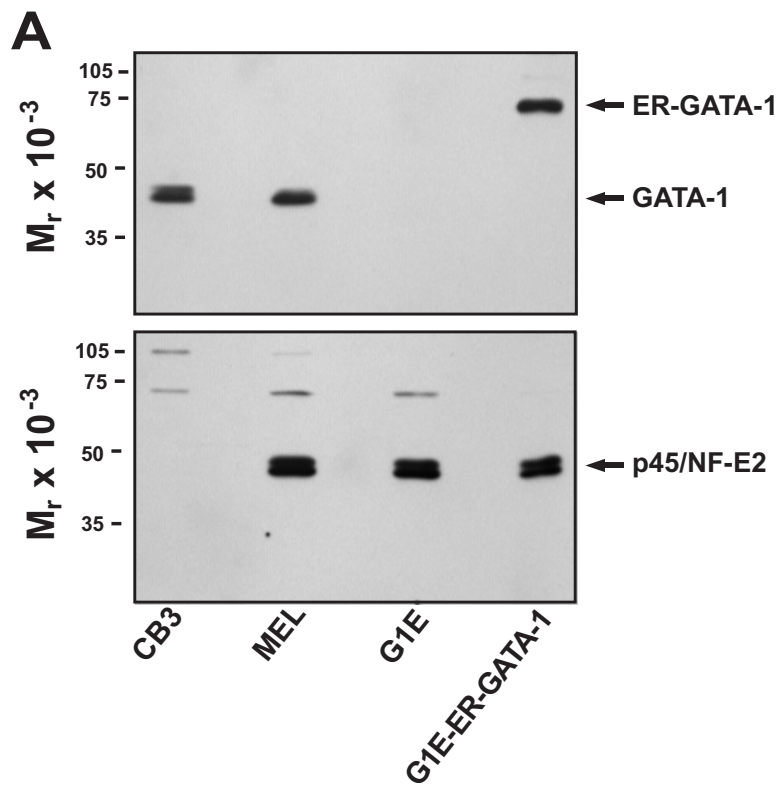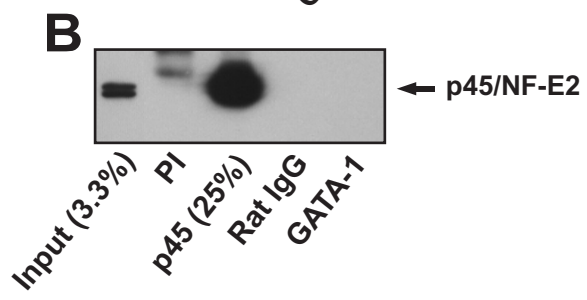

Supplement: pnas_192285999_5.pdf [file pnas_192285999_5.pdf]
